# Supplementary material
Source: HighWire-hosted journal article supplement (https://bmjopenquality.bmj.com/content/11/1/e001637)

## Appendix 2: Example of an analysis of the sociotechnical work system using the Generic Analysis Method

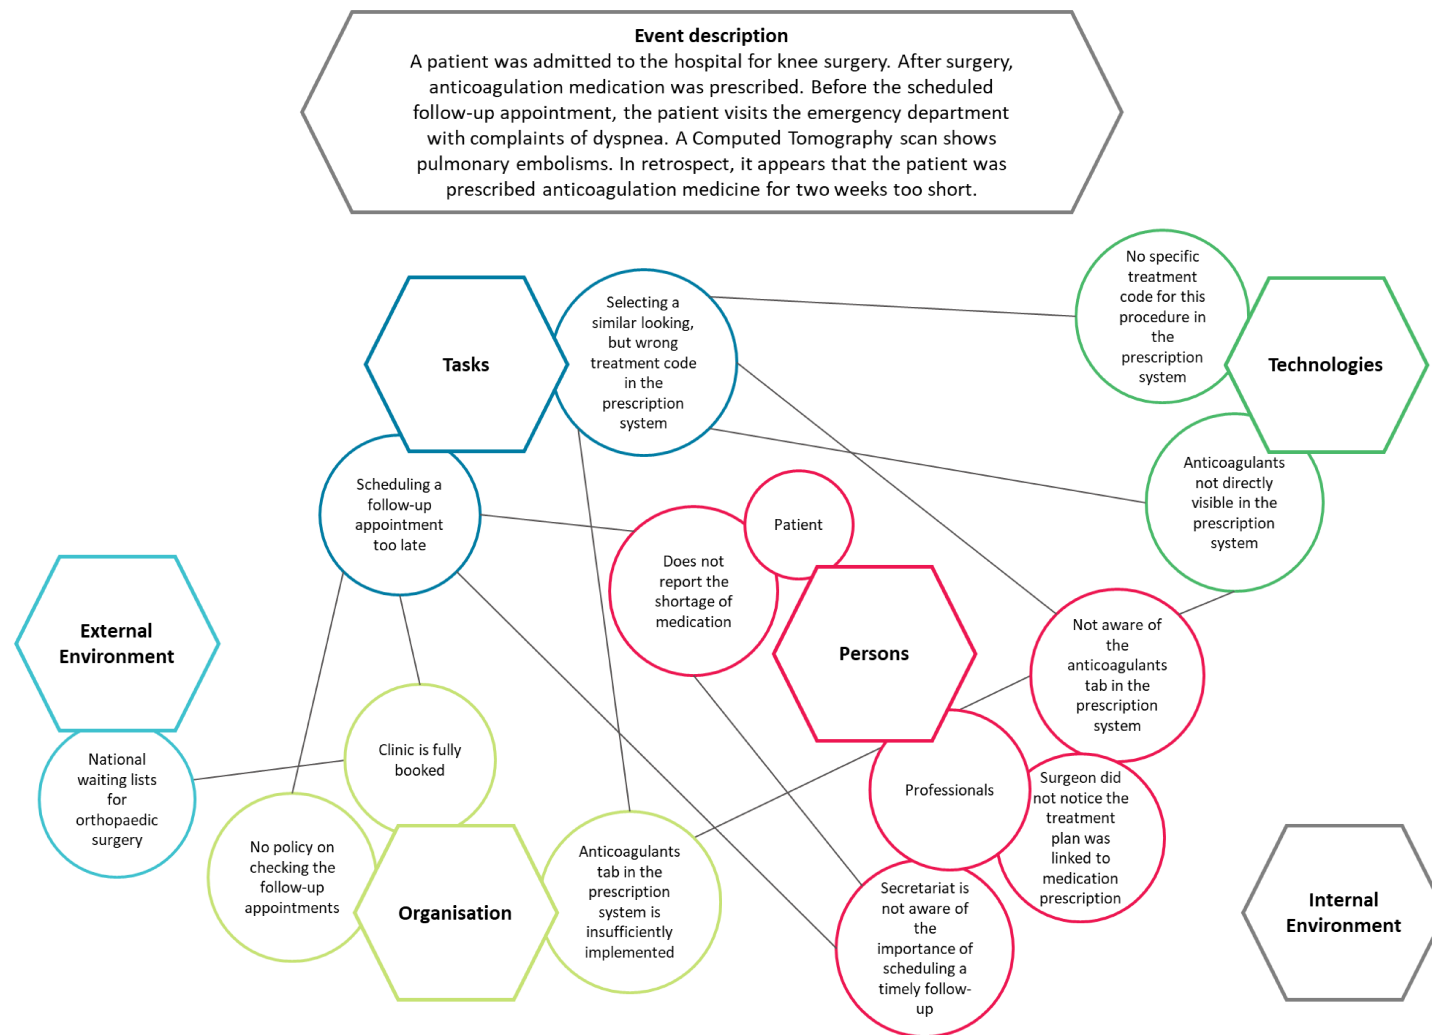

Supplement: inline-supplementary-material-2 [file inline-supplementary-material-2.pdf]
